# Supplementary material for: Tailored mesoporous copper/ceria catalysts for the selective hydrogenolysis of biomass-derived glycerol and sugar alcohols
Source: Royal Society of Chemistry journal article supplement (doi:10.1039/c5gc01766a), 2015-09-02
Supplement: c5gc01766a1.pdf [file c5gc01766a1.pdf]

**Electronic supplementary information for**

**Tailored mesoporous copper/ceria catalysts for selective  
hydrogenolysis of biomass-derived glycerol and sugar alcohols†**

Shanhui Zhu,<sup>\*a</sup> Xiaoqing Gao,<sup>b</sup> Yulei Zhu,<sup>a,b</sup> and Yongwang Li<sup>a,b</sup>

<sup>a</sup>*State Key Laboratory of Coal Conversion, Institute of Coal Chemistry, Chinese  
Academy of Sciences, Taiyuan 030001, PR China*

<sup>b</sup>*Synfuels China Co. Ltd., Taiyuan 030032, PR China*

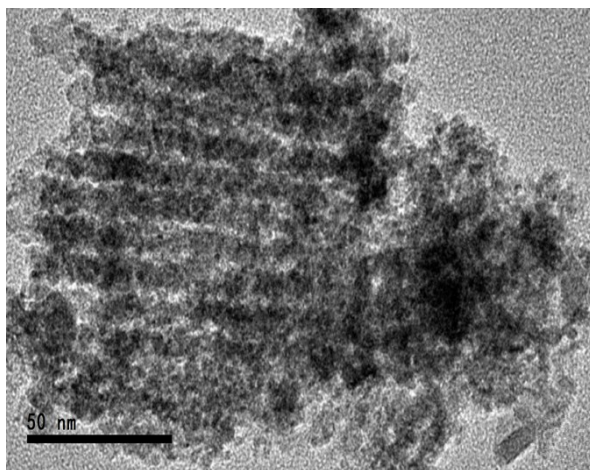

**Fig. S1** TEM image of CuCeSBA without solid-state grinding.

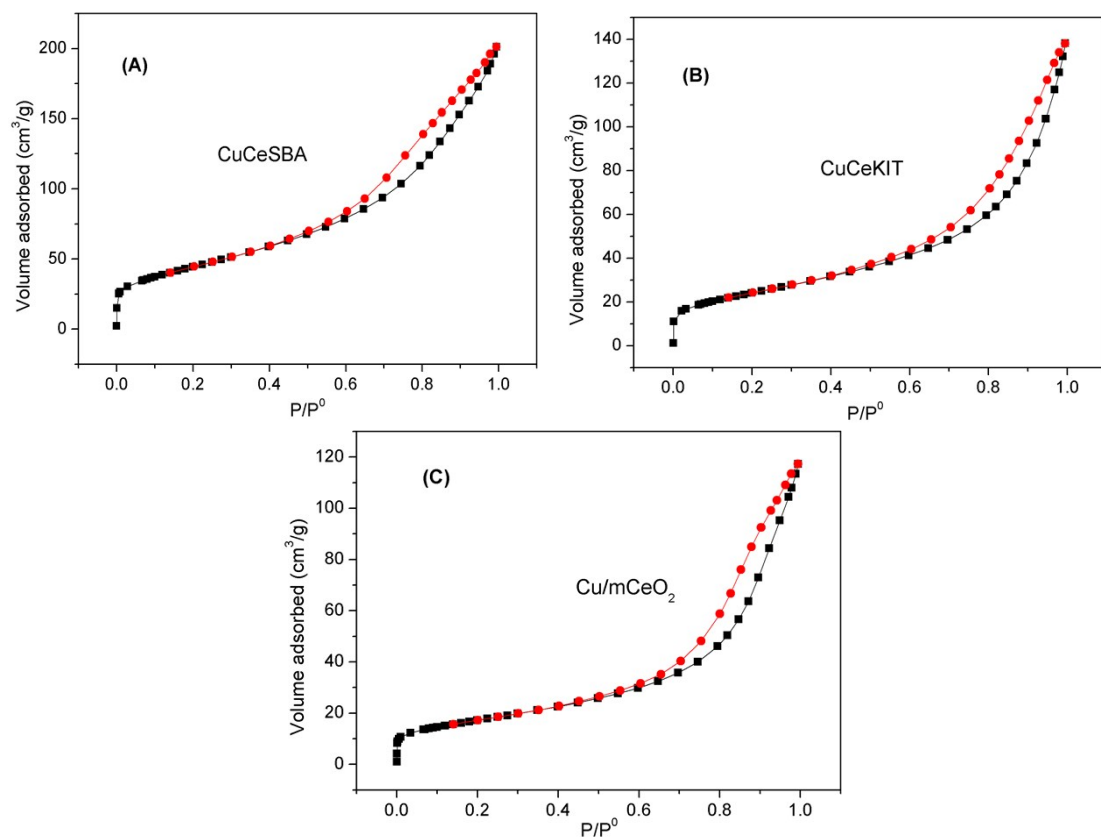

**Fig. S2**  $N_2$  adsorption/desorption isotherms of various catalysts.

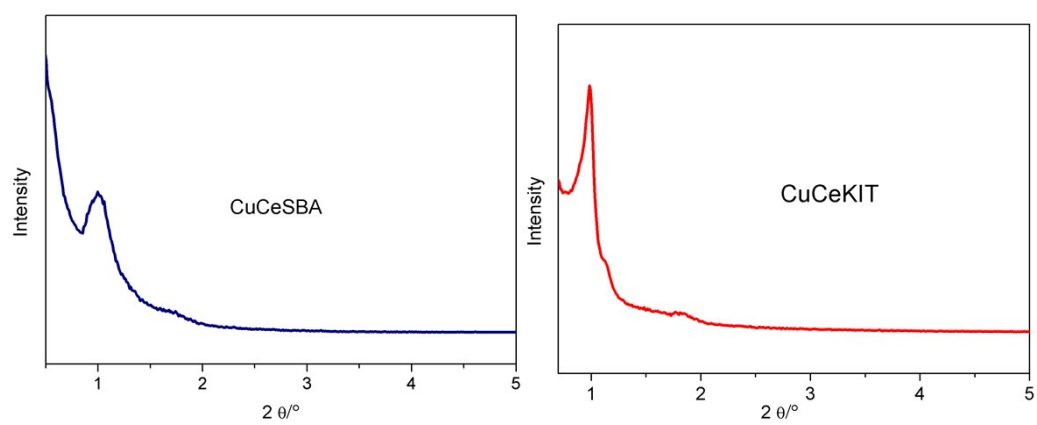

**Fig. S3** Low angle XRD of CuCeSBA and CuCeKIT.

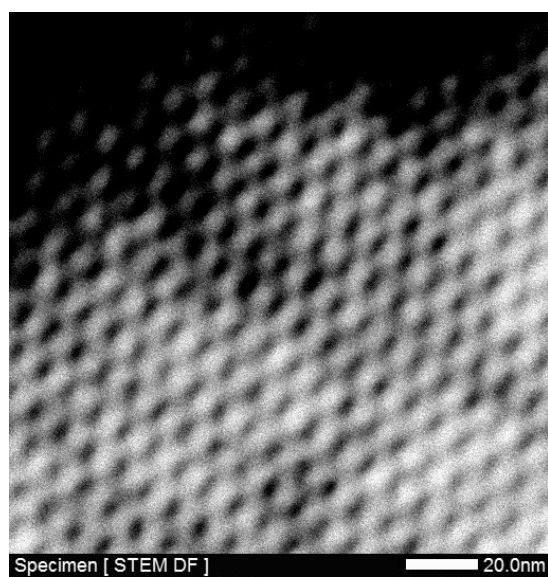

**Fig. S4** STEM in dark field of the CuCeKIT.

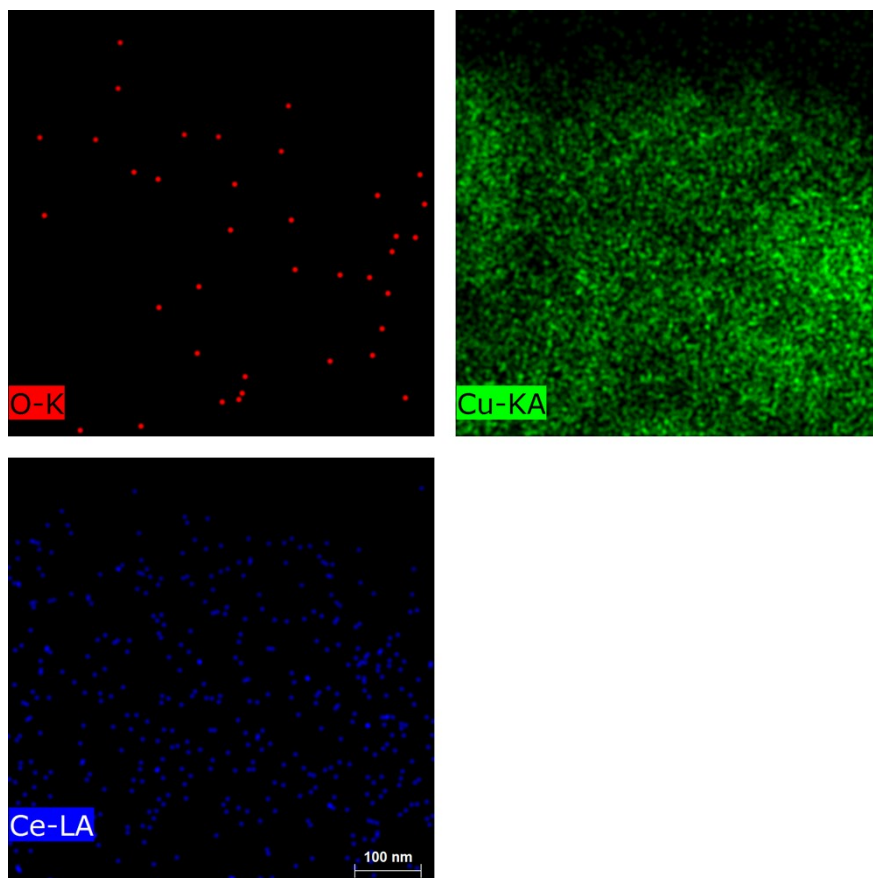

**Fig. S5** EDX mapping of the CuCeKIT.

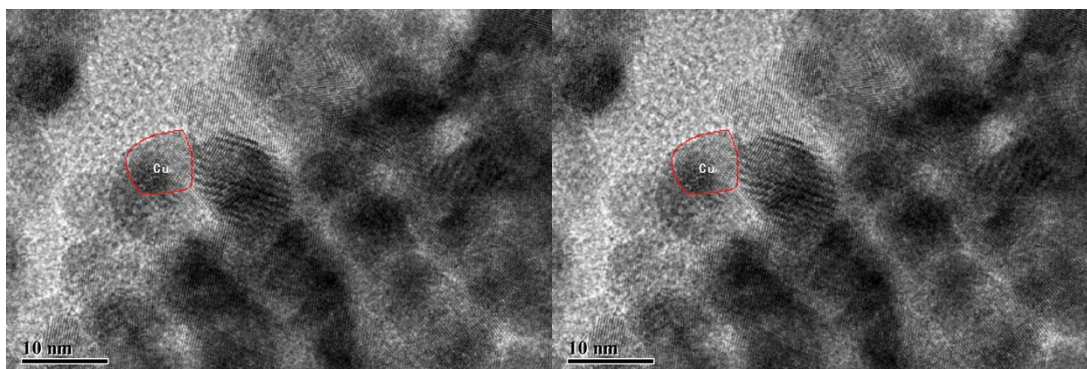

**Fig. S6** TEM images of Cu/mCeO<sub>2</sub>.

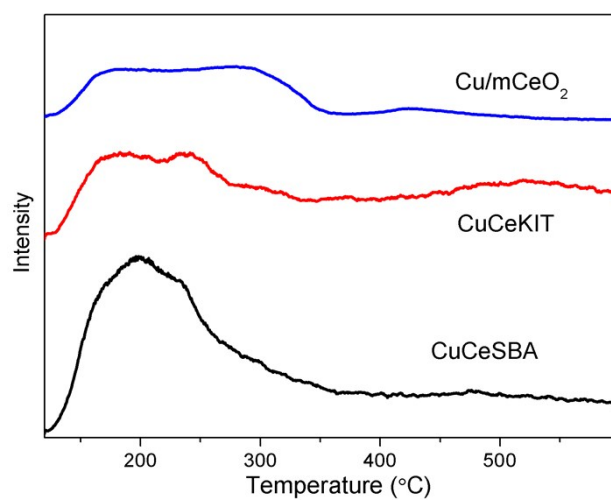

**Fig. S7** NH<sub>3</sub>-TPD profiles of various catalysts.

The total acidity of CuCeSBA, CuCeKIT and Cu/mCeO<sub>2</sub> were 0.29, 0.15 and 0.12 mmol/g, respectively.



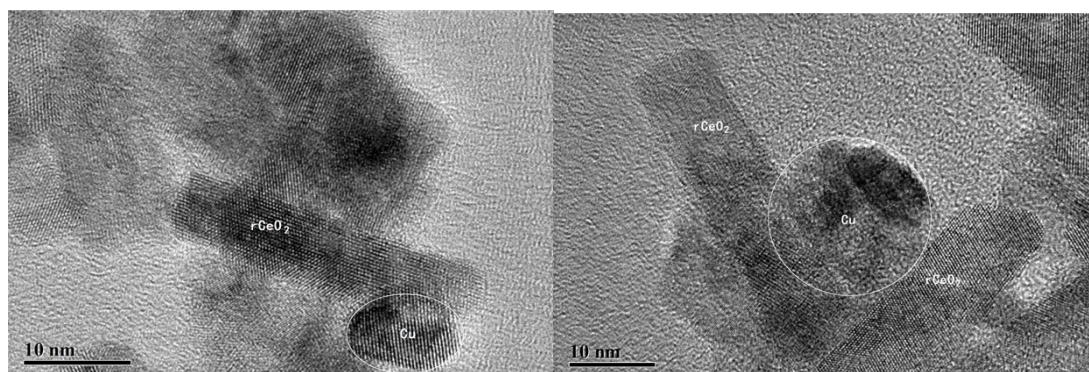

**Fig. S8** TEM images of Cu/rCeO<sub>2</sub>.
